# Supplementary material for: Enhanced Stability of Oral Vitamin C Delivery: A Novel Large-Scale Method for Liposomes Production and Encapsulation through Dynamic High-Pressure Microfluidization
Source: MDPI journal article supplement (doi:10.3390/nano14060516), 2024-03-14
Supplement: s1 [file s1]

## Supporting Data

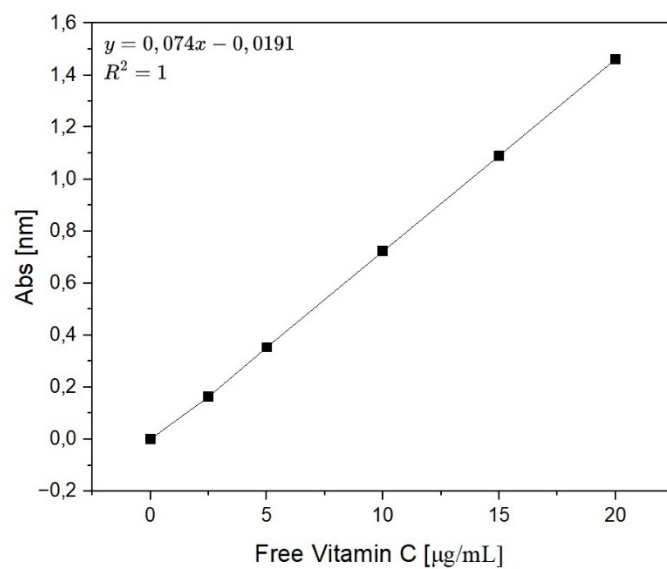

**Figure S1.** Calibration curve of Free Vitamin C. UV-Vis Spectrophotometric analysis was performed at 265 nm with a Vitamin C concentration in the range 2.5-20 μg/mL.

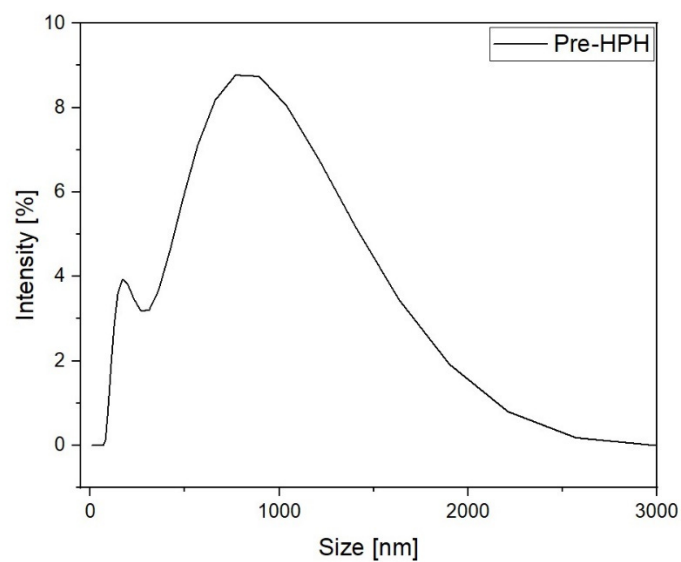

**Figure S2.** Particle Size Distribution by DLS measurement of Coarse emulsion obtained before HPH treatment.

| Cycles | Pressure (PSI) | Diameter (nm) | PDI   | EE (%) | Zeta-Potential (mV) |
|--------|----------------|---------------|-------|--------|---------------------|
| 1      | 10000          | 117.277       | 0.252 | 59.727 | -39.393 ± 0.657     |
|        | 20000          | 112.003       | 0.270 | 76.031 | -33.480 ± 0.824     |
|        | 30000          | 104.852       | 0.282 | 80.68  | -35.887 ± 1.315     |
| 2      | 10000          | 111.338       | 0.272 | 76.533 | -47.04 ± 1.130      |
|        | 20000          | 81.692        | 0.248 | 83.479 | -48.97 ± 1.350      |
|        | 30000          | 76.987        | 0.233 | 72.366 | -47.06 ± 0.480      |
| 3      | 10000          | 117.575       | 0.262 | 67.178 | -37.657 ± 0.900     |
|        | 20000          | 93.861        | 0.253 | 79.597 | -37.083 ± 0.695     |
|        | 30000          | 110.906       | 0.320 | 78.769 | -37.470 ± 0.269     |

**Table S1.** HPH overall process parameters and their effect on particle size, PDI, EE% and Zeta-potential of Lipo-C formulations.

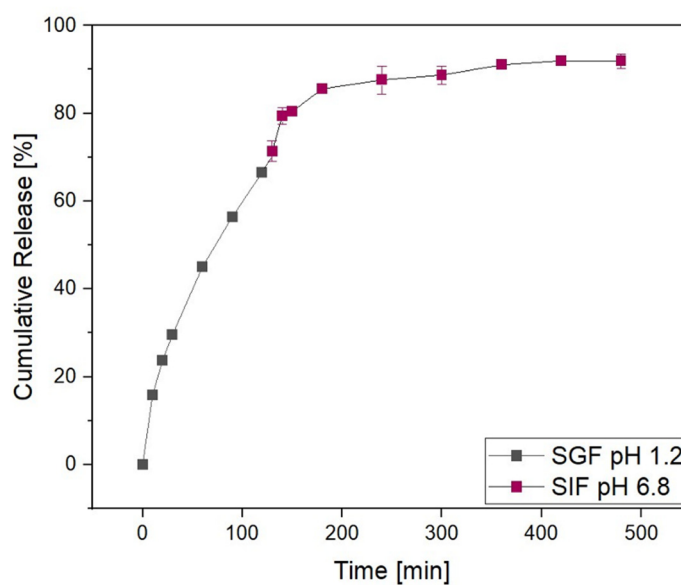

**Figure S3.** Cumulative Release % of Free Vitamin C from a dialysis bag in GIF up to 8 h.
